# Supplementary material for: Puede ser eficaz la sinoviortesis en el control de los hidrartros de repetición refractaria al tratamiento convencional
Source: HighWire-hosted journal article supplement (doi:10.1136/bjsports-2022-105825), 2006-01-01
Supplement: bjsports-2022-105825supp001_data_supplement.pdf [file bjsports-2022-105825supp001_data_supplement.pdf]

## Supplementary file

Table S1. Sample socio-demographic characteristics by intervention group across timepoints (N=342; sample with valid accelerometer data at baseline)

| Characteristic                    | Intervention groups |           |           |           |
|-----------------------------------|---------------------|-----------|-----------|-----------|
|                                   | C                   | PA-I      | SB-I      | PA + SB-I |
| <i>Baseline</i>                   |                     |           |           |           |
| n                                 | 89                  | 97        | 81        | 75        |
| Sex, %                            |                     |           |           |           |
| Male                              | 44.1                | 42.3      | 35.8      | 49.3      |
| Female                            | 56.0                | 57.7      | 64.2      | 50.7      |
| Age (years), mean (SD)            | 8.2 (0.5)           | 8.3 (0.5) | 8.3 (0.5) | 8.4 (0.5) |
| School socio-economic status, %   |                     |           |           |           |
| Low                               | 40.5                | 31.0      | 34.6      | 30.7      |
| Medium/High                       | 59.5                | 69.0      | 65.4      | 69.3      |
| <i>18-months</i>                  |                     |           |           |           |
| n                                 | 38                  | 53        | 43        | 41        |
| Sex, %                            |                     |           |           |           |
| Male                              | 42.1                | 35.9      | 34.9      | 46.3      |
| Female                            | 57.9                | 64.1      | 65.1      | 53.7      |
| Age @ baseline (years), mean (SD) | 8.2 (0.5)           | 8.2 (0.5) | 8.1 (0.5) | 8.3 (0.5) |
| School socio-economic status, %   |                     |           |           |           |
| Low                               | 48.6                | 28.3      | 34.9      | 29.3      |
| Medium/High                       | 51.4                | 71.7      | 65.1      | 70.7      |
| <i>30-months</i>                  |                     |           |           |           |
| n                                 | 44                  | 47        | 33        | 31        |
| Sex, %                            |                     |           |           |           |
| Male                              | 45.4                | 31.9      | 21.2      | 48.4      |
| Female                            | 54.6                | 68.1      | 78.8      | 51.6      |
| Age @ baseline (years), mean (SD) | 8.2 (0.5)           | 8.2 (0.5) | 8.2 (0.6) | 8.1 (0.3) |
| School socio-economic status, %   |                     |           |           |           |
| Low                               | 43.2                | 25.5      | 48.5      | 29.0      |
| Medium/High                       | 56.8                | 74.5      | 51.5      | 71.0      |

Notes. C=control; PA = physical activity; SB = sedentary behaviour

Table S2. Descriptive statistics of physical activity and sedentary behavior outcomes by intervention group and time of assessment (N=342; sample with valid accelerometer data at baseline)

|                                                              | Intervention group |          |          |           |
|--------------------------------------------------------------|--------------------|----------|----------|-----------|
| Sedentary time (min/day) in the week                         |                    |          |          |           |
|                                                              | C                  | PA-I     | SB-I     | PA + SB-I |
| Baseline                                                     | 334 (67)           | 339 (63) | 351 (63) | 344 (71)  |
| 18-months                                                    | 347 (60)           | 359 (67) | 343 (56) | 346 (72)  |
| 30-months                                                    | 387 (81)           | 396 (96) | 361 (58) | 370 (70)  |
| Sedentary time (min/day) on weekdays                         |                    |          |          |           |
|                                                              | C                  | PA-I     | SB-I     | PA + SB-I |
| Baseline                                                     | 327 (72)           | 322 (64) | 342 (57) | 328 (74)  |
| 18-months                                                    | 346 (62)           | 349 (68) | 333 (64) | 323 (71)  |
| 30-months                                                    | 371 (80)           | 381 (88) | 347 (60) | 369 (70)  |
| Moderate-to-vigorous physical activity (min/day) in the week |                    |          |          |           |
|                                                              | C                  | PA-I     | SB-I     | PA + SB-I |
| Baseline                                                     | 69 (27)            | 64 (20)  | 67 (19)  | 66 (19)   |
| 18-months                                                    | 57 (21)            | 51 (19)  | 56 (19)  | 55 (26)   |
| 30-months                                                    | 53 (24)            | 52 (21)  | 40 (13)  | 51 (14)   |
| Moderate-to-vigorous physical activity (min/day) on weekdays |                    |          |          |           |
|                                                              | C                  | PA-I     | SB-I     | PA + SB-I |
| Baseline                                                     | 69 (19)            | 62 (21)  | 69 (21)  | 64 (18)   |
| 18-months                                                    | 57 (19)            | 51 (19)  | 55 (21)  | 54 (27)   |
| 30-months                                                    | 53 (22)            | 53 (20)  | 41 (13)  | 56 (17)   |
| Sedentary breaks (frequency/day) in the week                 |                    |          |          |           |
|                                                              | C                  | PA-I     | SB-I     | PA + SB-I |
| Baseline                                                     | 313 (39)           | 310 (34) | 315 (47) | 316 (41)  |
| 18-months                                                    | 321 (42)           | 325 (43) | 323 (44) | 323 (45)  |
| 30-months                                                    | 309 (49)           | 319 (44) | 325 (44) | 312 (44)  |
| Sedentary breaks (frequency/day) on weekdays                 |                    |          |          |           |
|                                                              | C                  | PA-I     | SB-I     | PA + SB-I |
| Baseline                                                     | 313 (41)           | 311 (39) | 318 (48) | 318 (45)  |
| 18-months                                                    | 333 (46)           | 325 (44) | 328 (49) | 326 (43)  |
| 30-months                                                    | 312 (53)           | 326 (44) | 334 (58) | 322 (41)  |

Notes. C=control; PA = physical activity; SB = sedentary behaviour

Table S3. Mean baseline blood biomarker outcomes ( $\pm$ SD), modelled changes (95% CI) from baseline for each group, interaction p-value and the main effects (95% CI) at 18 months

| Outcome                                  | n  | Control group                        | n  | PA-I group                           | n  | SB-I group                           | n  | PA + SB-I group                      | PA * SB Interaction (p-value) | Main effects (if interaction not significant) or intervention effects (comparison between each experimental group and the control group) if interaction significant |                        |                      |
|------------------------------------------|----|--------------------------------------|----|--------------------------------------|----|--------------------------------------|----|--------------------------------------|-------------------------------|---------------------------------------------------------------------------------------------------------------------------------------------------------------------|------------------------|----------------------|
|                                          |    |                                      |    |                                      |    |                                      |    |                                      |                               | PA intervention                                                                                                                                                     | SB intervention        | PA + SB intervention |
| <b>LDL cholesterol (mmol/L)</b>          |    |                                      |    |                                      |    |                                      |    |                                      |                               |                                                                                                                                                                     |                        |                      |
| Baseline                                 | 46 | 2.47 $\pm$ 0.54                      | 70 | 2.69 $\pm$ 0.70                      | 51 | 2.60 $\pm$ 0.85                      | 51 | 2.49 $\pm$ 0.56                      |                               |                                                                                                                                                                     |                        |                      |
| Change at 18 months                      | 26 | 0.14<br>(-0.04, 0.32)                | 41 | -0.13<br>(-0.27, 0.01)               | 30 | -0.12<br>(-0.28, 0.04)               | 28 | -0.10<br>(-0.27, 0.07)               | p=0.078                       | -0.13<br>(-0.30, 0.04)                                                                                                                                              | -0.10<br>(-0.26, 0.07) | NA                   |
| <b>HDL cholesterol (mmol/L)</b>          |    |                                      |    |                                      |    |                                      |    |                                      |                               |                                                                                                                                                                     |                        |                      |
| Baseline                                 | 46 | 1.60 $\pm$ 0.37                      | 70 | 1.65 $\pm$ 0.35                      | 51 | 1.71 $\pm$ 0.33                      | 51 | 1.62 $\pm$ 0.34                      |                               |                                                                                                                                                                     |                        |                      |
| Change at 18 months                      | 26 | -0.04<br>(-0.14, 0.06)               | 41 | -0.03<br>(-0.10, 0.04)               | 30 | -0.14 <sup>b</sup><br>(-0.23, -0.05) | 28 | -0.02<br>(-0.11, 0.07)               | p=0.233                       | 0.06<br>(-0.02, 0.15)                                                                                                                                               | -0.03<br>(-0.12, 0.05) | NA                   |
| <b>Total cholesterol (mmol/L)</b>        |    |                                      |    |                                      |    |                                      |    |                                      |                               |                                                                                                                                                                     |                        |                      |
| Baseline                                 | 46 | 4.44 $\pm$ 0.64                      | 70 | 4.64 $\pm$ 0.77                      | 51 | 4.65 $\pm$ 0.91                      | 51 | 4.44 $\pm$ 0.63                      |                               |                                                                                                                                                                     |                        |                      |
| Change at 18 months                      | 26 | 0.08<br>(0.11, 0.27)                 | 41 | -0.13<br>(-0.27, 0.02)               | 30 | -0.17<br>(-0.34, 0.00)               | 28 | -0.12<br>(-0.29, 0.06)               | p=0.134                       | -0.08<br>(-0.26, 0.10)                                                                                                                                              | -0.11<br>(-0.29, 0.07) | NA                   |
| <b>Triglycerides (mg/dL)<sup>§</sup></b> |    |                                      |    |                                      |    |                                      |    |                                      |                               |                                                                                                                                                                     |                        |                      |
| Baseline                                 | 46 | 0.75 $\pm$ 0.34<br>[0.70 $\pm$ 0.40] | 70 | 0.67 $\pm$ 0.25<br>[0.60 $\pm$ 0.30] | 51 | 0.72 $\pm$ 0.24<br>[0.70 $\pm$ 0.30] | 51 | 0.71 $\pm$ 0.32<br>[0.60 $\pm$ 0.40] |                               |                                                                                                                                                                     |                        |                      |
| Change at 18 months                      | 26 | 1.15<br>(0.93, 1.41)                 | 41 | 1.10<br>(1.00, 1.20)                 | 30 | 1.16<br>(0.98, 1.38)                 | 28 | 0.93<br>(0.80, 1.08)                 | p=0.263                       | 0.87<br>(0.74, 1.03)                                                                                                                                                | 0.89<br>(0.76, 1.03)   | NA                   |
| <b>Glucose (mmol/L)</b>                  |    |                                      |    |                                      |    |                                      |    |                                      |                               |                                                                                                                                                                     |                        |                      |
| Baseline                                 | 46 | 4.69 $\pm$ 0.54                      | 70 | 4.54 $\pm$ 0.41                      | 51 | 4.56 $\pm$ 0.43                      | 50 | 4.59 $\pm$ 0.32                      |                               |                                                                                                                                                                     |                        |                      |
| Change at 18 months                      | 26 | -0.22 <sup>a</sup><br>(-0.39, -0.04) | 42 | -0.02<br>(-0.16, 0.12)               | 30 | -0.07<br>(-0.24, 0.09)               | 28 | -0.06<br>(-0.23, 0.11)               | p=0.282                       | 0.11<br>(-0.06, 0.27)                                                                                                                                               | 0.04<br>(-0.12, 0.21)  |                      |
| <b>Insulin (uU/mL)<sup>§</sup></b>       |    |                                      |    |                                      |    |                                      |    |                                      |                               |                                                                                                                                                                     |                        |                      |
| Baseline                                 | 46 | 6.87 $\pm$ 4.37<br>[5.75 $\pm$ 4.80] | 70 | 5.86 $\pm$ 4.35<br>[4.80 $\pm$ 3.70] | 51 | 5.94 $\pm$ 3.06<br>[5.60 $\pm$ 4.70] | 51 | 6.40 $\pm$ 3.85<br>[5.90 $\pm$ 5.10] |                               |                                                                                                                                                                     |                        |                      |

|                                    |    |                                     |    |                                      |    |                                    |    |                                   |         |                                                |                                                |    |
|------------------------------------|----|-------------------------------------|----|--------------------------------------|----|------------------------------------|----|-----------------------------------|---------|------------------------------------------------|------------------------------------------------|----|
| Change at 18 months                | 26 | 1.20<br>(0.92, 1.56)                | 40 | 1.54 <sup>c</sup><br>(1.28, 1.86)    | 30 | 1.24<br>(1.98, 1.58)               | 28 | 1.12<br>(0.88, 1.42)              | p=0.130 | 1.09<br>(0.86, 1.38)                           | 0.84<br>(0.67, 1.07)                           | NA |
| <b>Vitamin D (nmol/L)</b>          |    |                                     |    |                                      |    |                                    |    |                                   |         |                                                |                                                |    |
| Baseline                           | 46 | 74.3 ± 29.9                         | 70 | 71.7 ± 23.4                          | 51 | 75.4 ± 30.0                        | 51 | 69.3 ± 20.8                       |         |                                                |                                                |    |
| Change at 18 months                | 26 | -14.3 <sup>b</sup><br>(-22.7, -5.8) | 40 | -16.4 <sup>c</sup><br>(-22.8, -10.0) | 29 | -9.2 <sup>a</sup><br>(-16.9, -1.5) | 28 | -2.4<br>(-10.2, 5.3)              | p=0.248 | 2.3<br>(-5.2, 9.9)                             | <b>10.1<sup>b</sup></b><br><b>(2.6, 17.5)</b>  | NA |
| <b>C-reactive protein (mg/L) §</b> |    |                                     |    |                                      |    |                                    |    |                                   |         |                                                |                                                |    |
| Baseline                           | 46 | 0.84 ± 1.68<br>[0.40 ± 0.70]        | 69 | 0.74 ± 1.38<br>[0.20 ± 0.60]         | 51 | 0.61 ± 0.69<br>[0.30 ± 0.60]       | 51 | 0.69 ± 1.37<br>[0.20 ± 0.60]      |         |                                                |                                                |    |
| Change at 18 months                | 25 | 1.33<br>(0.69, 2.58)                | 42 | 1.94 <sup>c</sup><br>(1.46, 2.57)    | 28 | 0.93<br>(0.56, 1.55)               | 28 | 3.17 <sup>c</sup><br>(1.98, 5.08) | p=0.128 | <b>1.53<sup>a</sup></b><br><b>(1.07, 2.20)</b> | 1.22<br>(0.85, 1.75)                           | NA |
| <b>BDNF (pg/ml) §</b>              |    |                                     |    |                                      |    |                                    |    |                                   |         |                                                |                                                |    |
| Baseline                           | 44 | 20.4 ± 6.64<br>[21.2 ± 8.4]         | 66 | 20.6 ± 6.6<br>[21.1 ± 7.1]           | 48 | 22.7 ± 6.5<br>[22.2 ± 8.5]         | 48 | 20.3 ± 8.0<br>[18.9 ± 9.6]        |         |                                                |                                                |    |
| Change at 18 months                | 25 | 1.03<br>(0.80, 1.32)                | 40 | 1.17 <sup>b</sup><br>(1.05, 1.31)    | 28 | 0.94<br>(0.77, 1.14)               | 27 | 0.87<br>(0.73, 1.04)              | p=0.279 | 1.02<br>(0.85, 1.24)                           | <b>0.79<sup>a</sup></b><br><b>(0.66, 0.95)</b> | NA |
| <b>sE-Selectin (ng/ml) §</b>       |    |                                     |    |                                      |    |                                    |    |                                   |         |                                                |                                                |    |
| Baseline                           | 44 | 63.9 ± 28.3<br>[57.9 ± 39.7]        | 66 | 62.7 ± 28.9<br>[51.9 ± 32.7]         | 48 | 71.2 ± 28.8<br>[75.7 ± 40.4]       | 48 | 76.9 ± 36.8<br>[67.8 ± 51.2]      |         |                                                |                                                |    |
| Change at 18 months                | 25 | 1.06<br>(0.89, 1.27)                | 40 | 1.00<br>(0.93, 1.07)                 | 28 | 0.93<br>(0.82, 1.06)               | 27 | 0.96<br>(0.86, 1.07)              | p=0.438 | 0.98<br>(0.87, 1.11)                           | 0.94<br>(0.84, 1.05)                           | NA |
| <b>sVCAM (pg/ml) §</b>             |    |                                     |    |                                      |    |                                    |    |                                   |         |                                                |                                                |    |
| Baseline                           | 44 | 1502 ± 277<br>[1473 ± 351]          | 66 | 1501 ± 251<br>[1487 ± 316]           | 48 | 1584 ± 290<br>[1560 ± 412]         | 48 | 1523 ± 311<br>[1438 ± 413]        |         |                                                |                                                |    |
| Change at 18 months                | 25 | 0.95<br>(0.87, 1.04)                | 40 | 0.94 <sup>b</sup><br>(0.90, 0.99)    | 28 | 0.90 <sup>b</sup><br>(0.84, 0.97)  | 27 | 0.93 <sup>a</sup><br>(0.87, 0.99) | p=0.734 | 1.01<br>(0.95, 1.08)                           | 0.97<br>(0.91, 1.04)                           | NA |
| <b>sICAM (pg/ml) §</b>             |    |                                     |    |                                      |    |                                    |    |                                   |         |                                                |                                                |    |
| Baseline                           | 44 | 151.9 ± 38.0<br>[146.5 ± 53.4]      | 66 | 154.0 ± 49.0<br>[145.7 ± 45.7]       | 48 | 149.4 ± 41.4<br>[147.8 ± 45.4]     | 48 | 155.2 ± 86.7<br>[143.5 ± 55.1]    |         |                                                |                                                |    |
| Change at 18 months                | 25 | 0.92<br>(0.79, 1.06)                | 40 | 1.05<br>(0.96, 1.15)                 | 28 | 0.96<br>(0.84, 1.09)               | 27 | 0.99<br>(0.88, 1.11)              | p=0.401 | 1.09<br>(0.97, 1.23)                           | 0.98<br>(0.87, 1.10)                           | NA |
| <b>Adiponectin (pg/ml) §</b>       |    |                                     |    |                                      |    |                                    |    |                                   |         |                                                |                                                |    |
| Baseline                           | 44 | 28.5 ± 20.3<br>[24.0 ± 15.7]        | 66 | 30.8 ± 15.0<br>[27.6 ± 20.0]         | 48 | 29.4 ± 12.6<br>[28.7 ± 14.4]       | 48 | 24.6 ± 12.6<br>[22.9 ± 14.1]      |         |                                                |                                                |    |
| Change at 18 months                | 25 | 0.89<br>(0.71, 1.11)                | 39 | 0.88 <sup>c</sup><br>(0.82, 0.95)    | 28 | 0.84 <sup>a</sup><br>(0.73, 0.97)  | 26 | 0.96<br>(0.86, 1.08)              | p=0.345 | 1.09<br>(0.94, 1.26)                           | 1.07<br>(0.95, 1.21)                           | NA |

|                           |    |                                   |    |                              |    |                                   |    |                                   |                                                |                                                |                                                |                                                |
|---------------------------|----|-----------------------------------|----|------------------------------|----|-----------------------------------|----|-----------------------------------|------------------------------------------------|------------------------------------------------|------------------------------------------------|------------------------------------------------|
| <b>Resistin (pg/ml) §</b> |    |                                   |    |                              |    |                                   |    |                                   |                                                |                                                |                                                |                                                |
| Baseline                  | 44 | 22.1 ± 9.9<br>[20.7 ± 7.2]        | 66 | 21.6 ± 9.1<br>[20.0 ± 10.4]  | 48 | 23.6 ± 11.0<br>[22.6 ± 12.1]      | 48 | 21.7 ± 7.8<br>[20.6 ± 9.8]        |                                                |                                                |                                                |                                                |
| Change at 18 months       | 25 | 1.17<br>(0.89, 1.55)              | 39 | 1.08<br>(0.99, 1.17)         | 28 | 0.95<br>(0.81, 1.12)              | 26 | 1.26 <sup>c</sup><br>(1.10, 1.44) | p=0.052                                        | 1.16<br>(0.98, 1.39)                           | 1.09<br>(0.95, 1.26)                           | NA                                             |
| <b>PAI-1 (pg/ml) §</b>    |    |                                   |    |                              |    |                                   |    |                                   |                                                |                                                |                                                |                                                |
| Baseline                  | 44 | 258 ± 80<br>[264 ± 113]           | 66 | 238 ± 83<br>[231 ± 111]      | 48 | 276 ± 106<br>[245 ± 103]          | 48 | 247 ± 83<br>[232 ± 100]           |                                                |                                                |                                                |                                                |
| Change at 18 months       | 25 | 1.00<br>(0.88, 1.15)              | 40 | 0.97<br>(0.90, 1.03)         | 27 | 0.88 <sup>a</sup><br>(0.79, 0.99) | 27 | 0.83 <sup>c</sup><br>(0.75, 0.92) | p=0.910                                        | 0.95<br>(0.86, 1.06)                           | <b>0.87<sup>b</sup></b><br><b>(0.78, 0.96)</b> | NA                                             |
| <b>TNF-α (pg/ml) §</b>    |    |                                   |    |                              |    |                                   |    |                                   |                                                |                                                |                                                |                                                |
| Baseline                  | 44 | 11.7 ± 5.2<br>[10.7 ± 7.5]        | 66 | 11.5 ± 7.2<br>[10.3 ± 5.1]   | 48 | 12.4 ± 21.0<br>[9.1 ± 4.6]        | 48 | 12.6 ± 9.7<br>[10.5 ± 5.4]        |                                                |                                                |                                                |                                                |
| Change at 18 months       | 25 | 0.86<br>(0.71, 1.03)              | 40 | 0.99<br>(0.89, 1.10)         | 28 | 0.80 <sup>b</sup><br>(0.67, 0.95) | 27 | 0.99<br>(0.86, 1.14)              | p=0.639                                        | <b>1.20<sup>a</sup></b><br><b>(1.02, 1.40)</b> | 0.97<br>(0.84, 1.12)                           | NA                                             |
| <b>IL-10 (pg/ml) §</b>    |    |                                   |    |                              |    |                                   |    |                                   |                                                |                                                |                                                |                                                |
| Baseline                  | 44 | 31.1 ± 44.9<br>[16.6 ± 22.2]      | 66 | 31.5 ± 54.4<br>[13.5 ± 18.2] | 48 | 65.3 ± 278.6<br>[14.3 ± 18.8]     | 48 | 47.6 ± 159.0<br>[17.7 ± 22.8]     |                                                |                                                |                                                |                                                |
| Change at 18 months       | 25 | 0.84<br>(0.47, 1.48)              | 40 | 1.11<br>(0.87, 1.42)         | 28 | 1.00<br>(0.65, 1.53)              | 27 | 1.19<br>(0.82, 1.70)              | p=0.819                                        | 1.24<br>(0.82, 1.88)                           | 1.10<br>(0.76, 1.59)                           | NA                                             |
| <b>IL-8 (pg/ml) §</b>     |    |                                   |    |                              |    |                                   |    |                                   |                                                |                                                |                                                |                                                |
| Baseline                  | 44 | 26.6 ± 80.3<br>[6.7 ± 4.4]        | 66 | 9.6 ± 20.3<br>[5.5 ± 2.7]    | 48 | 11.2 ± 17.4<br>[5.8 ± 4.6]        | 48 | 11.2 ± 23.3<br>[4.7 ± 3.8]        |                                                |                                                |                                                |                                                |
| Change at 18 months       | 25 | 0.90<br>(0.56, 1.39)              | 40 | 0.98<br>(0.80, 1.21)         | 28 | 0.65 <sup>a</sup><br>(0.45, 0.93) | 27 | 0.80<br>(0.60, 1.09)              | p=0.698                                        | 1.17<br>(0.83, 1.65)                           | 0.80<br>(0.58, 1.07)                           | NA                                             |
| <b>IL-6 (pg/ml) §</b>     |    |                                   |    |                              |    |                                   |    |                                   |                                                |                                                |                                                |                                                |
| Baseline                  | 44 | 2.47 ± 6.80<br>[0.57 ± 2.10]      | 66 | 2.35 ± 7.41<br>[0.61 ± 1.20] | 48 | 4.10 ± 16.83<br>[0.40 ± 1.02]     | 48 | 2.45 ± 7.27<br>[0.45 ± 1.20]      |                                                |                                                |                                                |                                                |
| Change at 18 months       | 25 | 0.49 <sup>a</sup><br>(0.27, 0.88) | 40 | 1.23<br>(0.98, 1.55)         | 28 | 1.07<br>(0.71, 1.61)              | 27 | 1.00<br>(0.71, 1.41)              | <b>0.57<sup>a</sup></b><br><b>(0.37, 0.88)</b> | <b>1.74<sup>b</sup></b><br><b>(1.25, 2.43)</b> | <b>1.50<sup>a</sup></b><br><b>(1.03, 2.19)</b> | <b>1.50<sup>a</sup></b><br><b>(1.05, 2.16)</b> |
| <b>IL-2 (pg/ml) §</b>     |    |                                   |    |                              |    |                                   |    |                                   |                                                |                                                |                                                |                                                |
| Baseline                  | 44 | 2.54 ± 5.11<br>[1.48 ± 4.08]      | 66 | 3.25 ± 7.51<br>[1.17 ± 2.17] | 48 | 5.33 ± 19.36<br>[1.29 ± 2.67]     | 48 | 12.49 ± 45.56<br>[1.42 ± 3.79]    |                                                |                                                |                                                |                                                |
| Change at 18 months       | 25 | 0.92<br>(0.69, 1.21)              | 40 | 1.12<br>(0.99, 1.27)         | 28 | 0.83<br>(0.66, 1.03)              | 27 | 0.95<br>(0.79, 1.15)              | <b>0.35<sup>c</sup></b><br><b>(0.20, 0.63)</b> | <b>3.23<sup>c</sup></b><br><b>(2.04, 5.11)</b> | 0.86<br>(0.52, 1.44)                           | 0.99<br>(0.58, 1.67)                           |

*Notes.* Significant intervention effects bolded. All estimates of group-specific changes from baseline and intervention effects are adjusted for school socio-economic status, child's age and sex, baseline outcome value and season of assessment.

n = number of observations at specific time points; PA-I = physical activity (PA) promotion group; SB-I = reducing sedentary behaviour (SB) group; PA+SB-I = combination of PA-I and SB-I; LDL = low density lipoprotein; HDL = high density lipoprotein; vitamin D = 25(OH)D; BDNF = brain derived neurotrophic factor; sE-selectin = soluble E-selectin; sVCAM-1 = soluble vascular cellular adhesion molecule 1; sICAM 1 = soluble intercellular adhesion molecule 1; PAI-1 = Plasminogen Activator Inhibitor-1; TNF- $\alpha$  = tumor necrosis factor alpha; IL-2, -6, -8, 10 = interleukin-2, -6, -8, 10.

ns interact = interaction effect of PA and SB interventions not significant (p-value of interaction term). Only main effects of PA and SB interventions are reported. These represent the adjusted average difference in change from baseline between participants receiving the PA or SB intervention and those not receiving the interventions.

NA = not applicable. Only main effects of PA and SB are reported because the interaction effect of PA and SB interventions was not significant. If the interaction of PA and SB interventions was significant, intervention effects reported in this table represent the adjusted average difference in change from baseline between participants in a particular intervention group (PA-I, SB-I or PA+SB-I) and the control group.

<sup>§</sup> Baseline median and interquartile range values are also reported [in squared brackets] because the outcome variable was positively skewed. Group-specific changes from baseline and intervention effects for these outcome variables are expressed in the form of proportional changes as they are based on regression models with logarithmic link functions.

<sup>a</sup>  $p < .05$ ; <sup>b</sup>  $p < .01$ ; <sup>c</sup>  $p < .001$
